# Supplementary material for: Precursors of exhausted T cells are pre-emptively formed in acute infection
Source: Springer Nature journal article supplement (doi:10.1038/s41586-024-08451-4), 2025-01-08
Supplement: MOESM1 [file 41586_2024_8451_MOESM1_ESM.pdf › 41586_2024_8451_MOESM1_ESM.pdf]

---

## Supplementary information

---

# Precursors of exhausted T cells are pre-emptively formed in acute infection

---

In the format provided by the  
authors and unedited

| <b>Antibody</b> | <b>Fluorochrome</b> | <b>Company</b>    | <b>Clone</b> | <b>Product #</b> | <b>Dilution</b> |
|-----------------|---------------------|-------------------|--------------|------------------|-----------------|
| CD8a            | Pacific Blue        | Biolegend         | 56-6.7       | 100725           | 1:200           |
| CD8a            | BV510               | Biolegend         | 56-6.7       | 100752           | 1:200           |
| CD8a            | AF700               | Biolegend         | 56-6.7       | 100730           | 1:200           |
| CD44            | Pacific Blue        | Biolegend         | IM7          | 103020           | 1:400           |
| CD44            | BV510               | Biolegend         | IM7          | 103044           | 1:400           |
| CD44            | BV786               | Biolegend         | IM7          | 103059           | 1:400           |
| CD44            | FITC                | Biolegend         | IM7          | 103006           | 1:400           |
| CD44            | AF700               | Biolegend         | IM7          | 103026           | 1:400           |
| CD45.1          | Pacific Blue        | Biolegend         | A20          | 110722           | 1:200           |
| CD45.1          | AF700               | Biolegend         | A20          | 110724           | 1:200           |
| CD62L           | BV785               | Biolegend         | Mel-14       | 104440           | 1:200           |
| CXCR5           | PE                  | Invitrogen        | SPRCL5       | 12-7185-82       | 1:30            |
| CXCR5           | PE-cF594            | Biolegend         | L138D7       | 145504           | 1:30            |
| CXCR5           | PE/Cy7              | Invitrogen        | SPRCL5       | 25-7185-82       | 1:30            |
| IFN $\gamma$    | BV711               | Biolegend         | XMG1.2       | 505836           | 1:200           |
| IgG1 $\kappa$   | AF488               | Thermo Scientific | P3.6.2.8.1   | 53-4714-80       | 1:400           |
| KLRG1           | PerCp/Cy5.5         | Biolegend         | 2F1/KLRG1    | 138418           | 1:200           |
| KLRG1           | PE/Cy7              | Biolegend         | 2F1/KLRG1    | 138416           | 1:200           |
| KLRG1           | PE/Cy7              | Invitrogen        | 2F1/KLRG1    | 25-5893-82       | 1:200           |
| Nur77           | AF488               | Thermo Scientific | 12.14        | 53-5965-82       | 1:400           |
| PD-1            | BV421               | Biolegend         | 29F.1A12     | 135221           | 1:200           |
| PD-1            | BV605               | Biolegend         | 29F.1A12     | 135220           | 1:200           |
| PD-1            | PE/Cy7              | Biolegend         | RMP1-30      | 109110           | 1:200           |
| TCF-1           | BV421               | BD                | S33-966      | 566692           | 1:400           |
| TCF-1           | PE                  | BD                | S33-966      | 564217           | 1:400           |
| TIM3            | BV605               | Biolegend         | RMT3-23      | 119721           | 1:200           |
| TIM3            | PE                  | Biolegend         | RMT3-23      | 119704           | 1:200           |
| TIM3            | APC                 | Biolegend         | RMT3-23      | 119706           | 1:200           |
| TNF             | FITC                | Biolegend         | MP6-XT22     | 506304           | 1:200           |
| TOX             | PE                  | Invitrogen        | TXRX10       | 12-6502-82       | 1:400           |
| TOX             | eF660               | Invitrogen        | TXRX10       | 50-6502-82       | 1:400           |

**Supplementary Table 1: List of flow cytometry antibodies used for staining.**
