# Supplementary material for: Precursors of exhausted T cells are pre-emptively formed in acute infection
Source: Springer Nature journal article supplement (doi:10.1038/s41586-024-08451-4), 2025-01-08

# Precursor dynamics

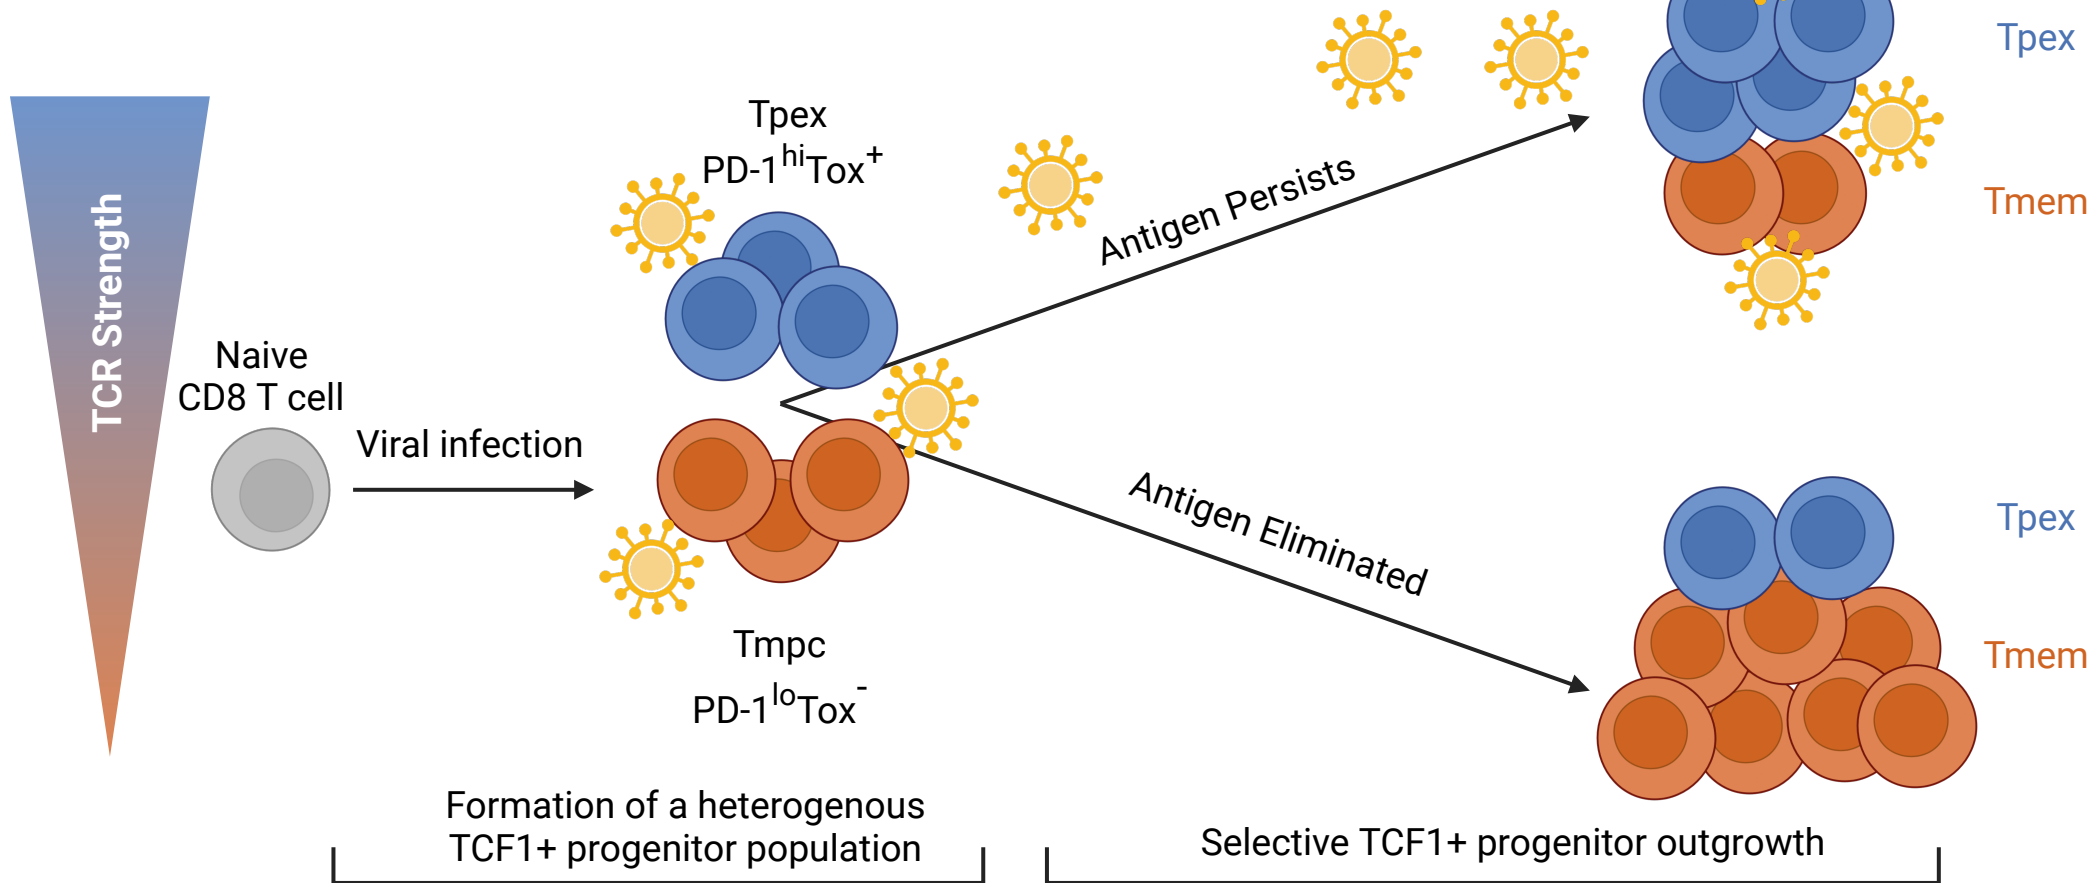

Supplement: MOESM3 [file 41586_2024_8451_MOESM3_ESM.pdf › 41586_2024_8451_MOESM3_ESM.pdf]
